# Supplementary material
Source: PubMed Central journal article supplement (PMC4014191)
Supplement: supp_ddu002_ddu002supp.pdf [file supp_ddu002_ddu002supp.pdf]

## Supplementary Data

### Loss of Function HDAC8 Mutations Cause a Phenotypic Spectrum of Cornelia de Lange Syndrome-like Features, Ocular Hypertelorism, Large Fontanelle and X-linked Inheritance.

Frank J. Kaiser<sup>1</sup>, Morad Ansari<sup>2</sup>, Diana Braunholz<sup>1</sup>, María Concepción Gil-Rodríguez<sup>1,3,4</sup>, Christophe Decroos<sup>5</sup>, Jonathan J. Wilde<sup>6</sup>, Christopher T. Fincher<sup>6</sup>, Maninder Kaur<sup>6</sup>, Masashige Bando<sup>7</sup>, David J. Amor<sup>8,9</sup>, Paldeep S. Atwal<sup>10</sup>, Melanie Bahlo<sup>11,12</sup>, Christine M. Bowman<sup>5</sup>, Jacquelyn J. Bradley<sup>6</sup>, Han G. Brunner<sup>13</sup>, Dinah Clark<sup>6</sup>, Miguel del Campo<sup>14</sup>, Nataliya Di Donato<sup>15</sup>, Peter Diakumis<sup>11,16</sup>, Holly Dubbs<sup>6</sup>, David A. Dymant<sup>16</sup>, Juliane Eckhold<sup>1</sup>, Sarah Ernst<sup>6</sup>, Jose C. Ferreira<sup>17</sup>, Lauren Francey<sup>6</sup>, Ulrike Gehlken<sup>1</sup>, Encarna Guillén-Navarro<sup>19</sup>, Yolanda Gyftodimou<sup>20</sup>, Bryan D. Hall<sup>21</sup>, Raoul Hennekam<sup>22</sup>, Louanne Hudgins<sup>10</sup>, Melanie Hullings<sup>6</sup>, Jennifer M. Hunter<sup>2</sup>, Helger IJntema<sup>13</sup>, A. Micheil Innes<sup>23</sup>, Antonie D. Kline<sup>24</sup>, Zita Krumina<sup>25</sup>, Hane Lee<sup>26</sup>, Kathleen Leppig<sup>27</sup>, Sally Ann Lynch<sup>28</sup>, Mark B. Mallozzi<sup>6</sup>, Linda Mannini<sup>29</sup>, Shane McKee<sup>30</sup>, Sarju G. Mehta<sup>31</sup>, Ieva Micule<sup>32</sup>, Shehla Mohammed<sup>33</sup>, Ellen Moran<sup>34</sup>, Geert R. Mortier<sup>35</sup>, Joe-Ann S. Moser<sup>5</sup>, Sarah E. Noon<sup>6</sup>, Naohito Nozaki<sup>36</sup>, Luis Nunes<sup>37</sup>, John G. Pappas<sup>38</sup>, Lynette S. Penney<sup>39</sup>, Antonio Pérez-Aytés<sup>40</sup>, Michael B. Petersen<sup>41</sup>, Beatriz Puisac<sup>3</sup>, Nicole Revencu<sup>42</sup>, Elizabeth Roeder<sup>43</sup>, Sulagna Saitta<sup>6,44</sup>, Angela E. Scheuerle<sup>45</sup>, Karen L. Schindeler<sup>46</sup>, Victoria M. Siu<sup>47</sup>, Zornitza Stark<sup>8</sup>, Samuel P. Strom<sup>26</sup>, Heidi Thiese<sup>27</sup>, Inga Vater<sup>48</sup>, Patrick Willems<sup>49</sup>, Kathleen Williamson<sup>2</sup>, Louise C. Wilson<sup>50</sup>, University of Washington Center for Mendelian Genomics<sup>51</sup>, Hakon Hakonarson<sup>6,52,53</sup>, Fabiola Quintero-Rivera<sup>26</sup>, Jolanta Wierzbza<sup>54</sup>, Antonio Musio<sup>29</sup>, Gabriele Gillessen-Kaesbach<sup>1</sup>, Feliciano J. Ramos<sup>3,4</sup>, Laird G. Jackson<sup>55</sup>, Katsuhiko Shirahige<sup>7,56</sup>, Juan Pié<sup>3,4</sup>, David W. Christianson<sup>5</sup>, Ian D. Krantz<sup>6,53</sup>, David R. FitzPatrick<sup>2</sup>, Matthew A. Deardorff<sup>6,53,\*</sup>

<sup>1</sup>Institut für Humangenetik, Universität zu Lübeck, Lübeck, 23538, Germany

<sup>2</sup>MRC Human Genetics Unit, IGMM, University of Edinburgh, Edinburgh EH4 2XU, United Kingdom

<sup>3</sup>Unit of Clinical Genetics and Functional Genomics, <sup>4</sup>Departments of Pharmacology-Physiology and Pediatrics, Medical School, University of Zaragoza, E-50009 Zaragoza, Spain

<sup>5</sup>Department of Chemistry, University of Pennsylvania, Philadelphia, PA, 19104, USA

<sup>6</sup>Division of Genetics, <sup>52</sup>Center for Applied Genomics, Children's Hospital of Philadelphia, Philadelphia, PA, 19104, USA

<sup>7</sup>Laboratory of Genome Structure and Function, Research Center for Epigenetic Disease, Institute of Molecular and Cellular Biosciences, The University of Tokyo, Tokyo 113-0032, Japan

<sup>8</sup>Victorian Clinical Genetics Services, Murdoch Childrens Research Institute, Parkville, Victoria 3052, Australia Departments of Paediatrics<sup>9</sup>, Mathematics and Statistics<sup>12</sup>, and Medical Biology<sup>16</sup> University of Melbourne, Melbourne, Victoria 3010, Australia

<sup>10</sup>Division of Medical Genetics, Department of Pediatrics, Stanford University, Stanford, CA 94305-5208, USA

<sup>11</sup>Bioinformatics Division, Walter and Eliza Hall Institute, Parkville, Victoria 3052, Australia

<sup>13</sup>Department of Human Genetics 855, Radboud University Medical Center, 6525GA Nijmegen, the Netherlands

<sup>14</sup>Department of Genetics, Hospital Vall d'Hebron, E-08015 Barcelona, Spain

<sup>15</sup>Institut für Klinische Genetik, Technische Universität Dresden, 01307 Dresden, Germany

<sup>17</sup>Genetics, Children's Hospital of Eastern Ontario, Ottawa, Ontario, K1H 8L1, Canada

<sup>18</sup>Human Genetics Lab and Obstetrics and Gynecology Department, Jacobi Medical Center, Bronx, NY 10461 USA

<sup>19</sup>Unit of Medical Genetics and Dysmorphology, Division of Pediatrics, Virgen de la Arrixaca University Hospital, E-30120 Murcia, Spain

<sup>20</sup>Department of Genetics, Institute of Child Health, GR-11527 Athens, Greece

<sup>21</sup>Department of Pediatrics, University of Kentucky, Lexington, KY, 40536, USA

<sup>22</sup>Department of Pediatrics, Academic Medical Center, Amsterdam 1105 AZ, The Netherlands

<sup>23</sup>Department of Medical Genetics, Alberta Children's Hospital, Calgary, Alberta, T3B 6A8 Canada

<sup>24</sup>The Harvey Institute for Human Genetics, Greater Baltimore Medical Center, Baltimore, MD 21204, USA

<sup>25</sup>Medical Genetics, Children's University Hospital, Riga LV-1067, Latvia

- <sup>26</sup>Department of Pathology and Laboratory Medicine, David Geffen School of Medicine at UCLA and the UCLA Clinical Genomics Center, University of California Los Angeles, Los Angeles, CA, 90024, USA
- <sup>27</sup>Genetic Services, Group Health Cooperative, Seattle WA 98112, USA
- <sup>28</sup>National Centre for Medical Genetics, Our Lady's Children's Hospital, Dublin, Ireland
- <sup>29</sup>Istituto di Ricerca Genetica e Biomedica, C.N.R., 56124 Pisa, Italy
- <sup>30</sup>Department of Genetic Medicine, Belfast City Hospital, Belfast, Ireland
- <sup>31</sup>Department of Clinical Genetics, Addenbrookes Hospital, Cambridge, Cambridge CB2 0QQ, United Kingdom
- <sup>32</sup>Department of Medical Genetics and Biology, Riga Stradins University, LV-1007 Riga, Latvia
- <sup>32</sup>Clinical Genetics Service, Guy's Hospital, London, SE1 9RT, United Kingdom
- <sup>34</sup>NYU Hospital for Joint Diseases, New York, NY 10003 USA
- <sup>35</sup>Department of Medical Genetics, Antwerp University Hospital and University of Antwerp, B-2650 Antwerp (Edegem), Belgium
- <sup>36</sup>Bio-Frontier Research Center, Tokyo Institute of Technology, Yokohama 226-8503, Japan
- <sup>37</sup>Medical Genetics Department, Dona Estefânia Hospital, CHLC and Medical Sciences Faculty of Lisbon, UNL, 1100 Lisboa, Portugal
- <sup>38</sup>Department of Pediatrics, NYU School of Medicine, New York, NY 10016, USA
- <sup>39</sup>Department of Pediatrics, Dalhousie University, Halifax, Nova Scotia, B3H 4R2 Canada
- <sup>40</sup>Unidad de Dismorfología y Genética Reproductiva, Grupo de Investigación en Perinatología, Instituto de Investigación Sanitaria Hospital Universitario LA FE, 46026 Valencia, Spain
- <sup>41</sup>Aalborg Hospital, Aarhus University Hospital, 9000 Aalborg, Denmark
- <sup>42</sup>Center for Human Genetics, Cliniques Universitaires St Luc, Université Catholique de Louvain, Brussels, Belgium
- <sup>43</sup>Division of Genetics, University of Texas San Antonio, San Antonio, Texas 78229, USA  
Medical Genetics Institute, Cedars-Sinai Medical Center, Los Angeles, CA 90048 USA
- <sup>44</sup>Division of Genetics, Departments of Pediatrics and Pathology and Laboratory Medicine, Cedars-Sinai Medical Center, Los Angeles, CA 90048, USA
- <sup>45</sup>Tesserae Genetics, Dallas TX 75230 USA
- <sup>46</sup>Maritime Medical Genetics Service, IWK Health Centre, Halifax, Nova Scotia, B3K 6R8 Canada
- <sup>47</sup>Division of Medical Genetics, Department of Pediatrics, Western University, London, Ontario, N6A 3K7, Canada
- <sup>48</sup>Institute of Human Genetics, University Hospital Schleswig-Holstein Campus Kiel/Christian-Albrechts University, Kiel, Germany
- <sup>49</sup>Gendia, 2020 Antwerp, Belgium
- <sup>50</sup>Department of Clinical Genetics, Great Ormond Street Hospital, London, WC1N 3JH United Kingdom
- <sup>51</sup>see the full listing of authors from the University of Washington Center for Mendelian Genomics in the supplemental materials.
- <sup>53</sup>Department of Pediatrics, University of Pennsylvania Perelman School of Medicine, Philadelphia, PA, 19104, USA
- <sup>54</sup>Departments of Pediatrics, Hematology, Oncology, Endocrinology, and General Nursery, Medical University of Gdansk, Gdansk, Poland
- <sup>55</sup>Department of Obstetrics and Gynecology, Drexel University School of Medicine, Philadelphia, PA, 19102 USA
- <sup>56</sup>CREST, JST, K's Gobancho, 7, Gobancho, Chiyoda-ku, Tokyo, 102-0076 Japan

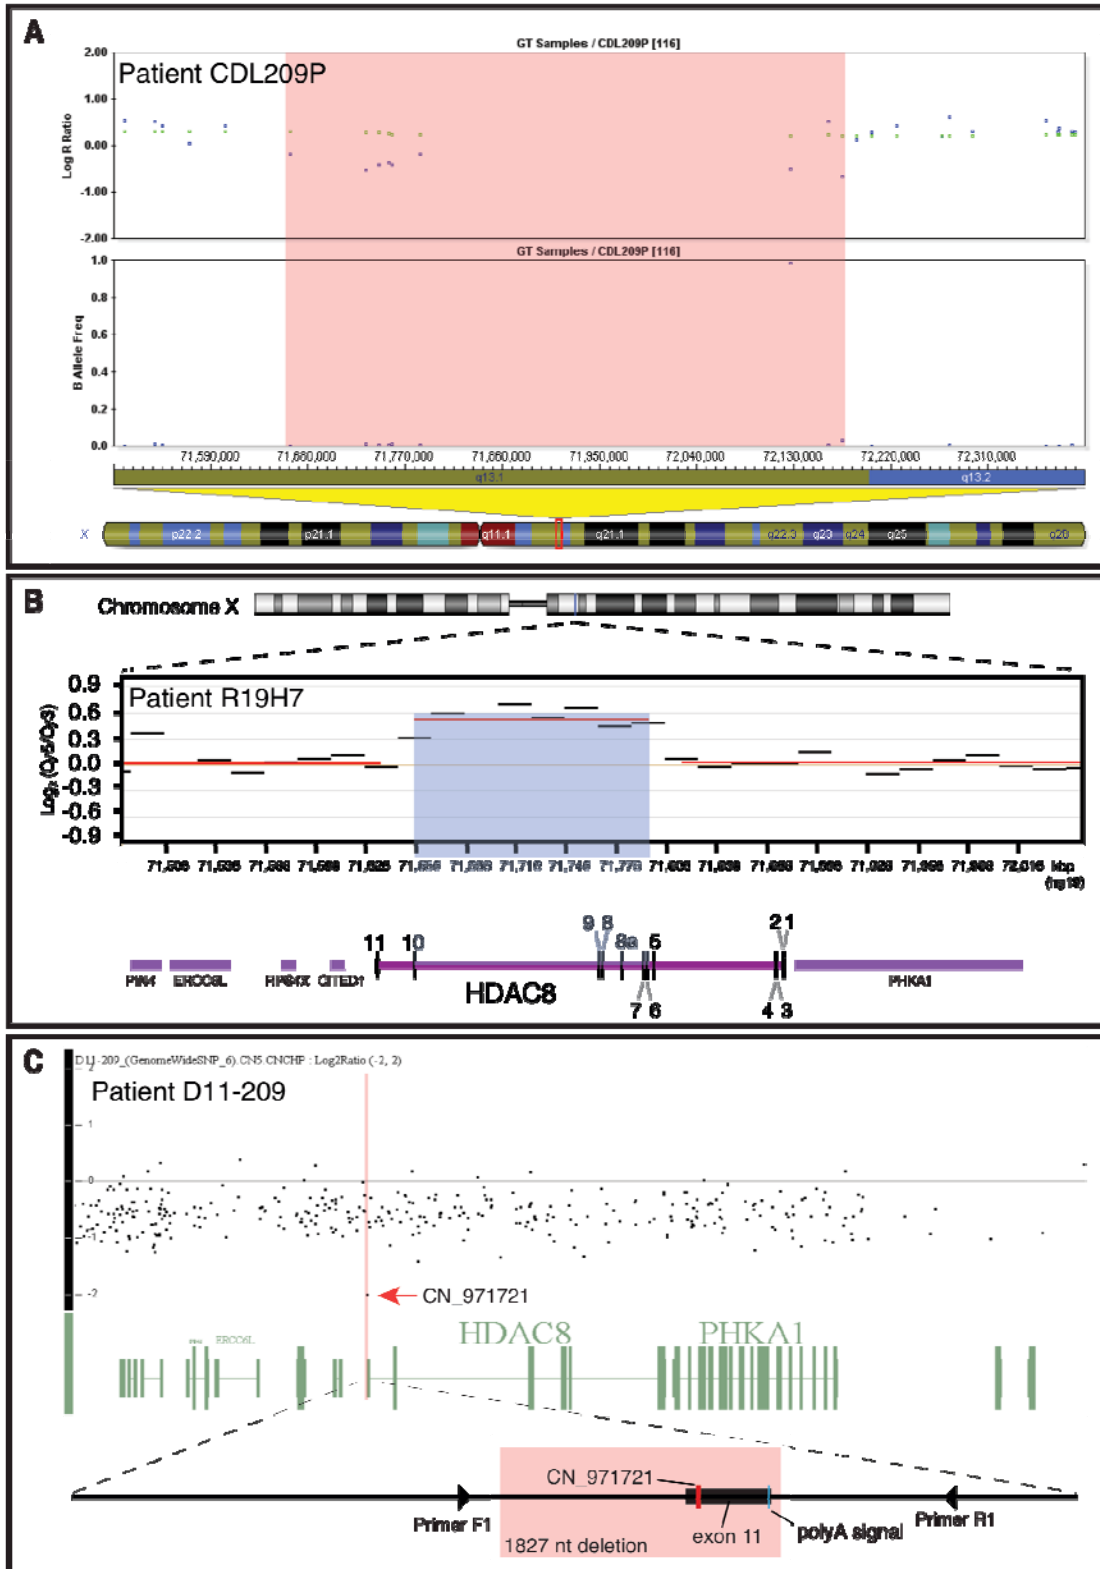

**Figure S1.** Chromosomal microdeletions and duplications disrupting the *HDAC8* locus. Raw data for Illumina SNP array (A), oligonucleotide array (B) and Affymetrix SNP array (C) is demonstrated. The region of chromosome or gene(s) included are shaded for the deletions (red, A,C) and duplication (blue, B).

| Variant             | HDAC8 activity<br>(nmol product. $\mu\text{mol enzyme}^{-1}.\text{min}^{-1}$ ) | Relative activity (%) |
|---------------------|--------------------------------------------------------------------------------|-----------------------|
| Wild-type           | 1390 $\pm$ 60                                                                  | 100 $\pm$ 4           |
| I19S                | 255 $\pm$ 4                                                                    | 18.3 $\pm$ 0.3        |
| H71Y                | 2 $\pm$ 1                                                                      | 0.1 $\pm$ 0.1         |
| P91L                | 1220 $\pm$ 20                                                                  | 87.8 $\pm$ 1.4        |
| G117E               | 93 $\pm$ 2                                                                     | 6.7 $\pm$ 0.1         |
| C153F               | 34 $\pm$ 2                                                                     | 2.4 $\pm$ 0.1         |
| H180R               | 0 $\pm$ 1                                                                      | 0 $\pm$ 0.1           |
| A188T               | 384 $\pm$ 30                                                                   | 27.6 $\pm$ 2.2        |
| D233G               | 416 $\pm$ 5                                                                    | 29.9 $\pm$ 0.4        |
| D237Y               | 439 $\pm$ 6                                                                    | 31.6 $\pm$ 0.4        |
| $\Delta$ K239-Y240N | 0 $\pm$ 2                                                                      | 0 $\pm$ 0.1           |
| I243N               | 475 $\pm$ 20                                                                   | 34.2 $\pm$ 1.4        |
| G304R               | 0 $\pm$ 1                                                                      | 0 $\pm$ 0.1           |
| T311M               | 158 $\pm$ 7                                                                    | 11.4 $\pm$ 0.5        |
| G320R               | 234 $\pm$ 10                                                                   | 16.8 $\pm$ 0.7        |
| H334R               | 1056 $\pm$ 40                                                                  | 76.0 $\pm$ 2.9        |

**Table S1.** Specific Activities and Relative Activities of HDAC8 Missense Mutations.

**University of Washington Center for Mendelian Genomics (UW CMG)**

Michael J. Bamshad<sup>1,2</sup>, Jay Shendure<sup>1</sup>, and Deborah A. Nickerson<sup>1</sup>  
 Gonçalo R. Abecasis<sup>4</sup>, Peter Anderson<sup>1</sup>, Marcus Annable<sup>1</sup>, Mallory Beightol<sup>1</sup>, Brian L. Browning<sup>1</sup>, Kati J. Buckingham<sup>1</sup>, Christina Chen<sup>1</sup>, Jennifer Chin<sup>1</sup>, Jessica X Chong<sup>1</sup>, Gregory M. Cooper<sup>5</sup>, Colleen Davis<sup>1</sup>, Lindsay Felker<sup>1</sup>, Christopher Frazer<sup>1</sup>, David Hanna<sup>1</sup>, Zongxiao He<sup>3</sup>, Preti Jain<sup>5</sup>, Gail P. Jarvik<sup>1</sup>, Eric Johanson<sup>1</sup>, Goo Jun<sup>4</sup>, Martin Kircher<sup>1</sup>, Tom Kolar<sup>1</sup>, Niklas Krumm<sup>1</sup>, Suzanne M. Leal<sup>3</sup>, Daniel Luksic<sup>1</sup>, Margaret J. McMillin<sup>1</sup>, Sean McGee<sup>1</sup>, Brenton Munson<sup>1</sup>, Brian J. O'Roak<sup>1</sup>, Bryan Paepers<sup>1</sup>, Karynne Patterson<sup>1</sup>, Eric Phillips<sup>1</sup>, Jessica Pijoan<sup>1</sup>, Christa Poel<sup>1</sup>, Peggy D. Robertson<sup>1</sup>, Regie Santos-Cortez<sup>3</sup>, Tristan Shaffer<sup>1</sup>, Cindy Shephard<sup>1</sup>, Deborah L. Siegel<sup>1</sup>, Joshua D. Smith<sup>1</sup>, Jeffrey C. Staples<sup>1</sup>, Holly K. Tabor<sup>1,2</sup>, Monica Tackett<sup>1</sup>, Gao Wang<sup>3</sup>, and Qian Yi<sup>1</sup>

<sup>1</sup>University of Washington

<sup>2</sup>Seattle Children's Hospital

<sup>3</sup>Baylor College of Medicine

<sup>4</sup>University of Michigan

<sup>5</sup>HudsonAlpha Institute of Technology
